# Supplementary material for: Dynamic polymer nanocomposites towards strain sensors and customizable resistors
Source: Royal Society of Chemistry journal article supplement (doi:10.1039/d3lp00012e), 2023-01-01
Supplement: d3lp00012e4.pdf [file d3lp00012e4.pdf]

# Supporting Information: Dynamic Polymer Nanocomposites Towards Strain Sensors and Customizable Resistors

Obed J. Dodo,<sup>†</sup> Ibrahim O. Raji,<sup>†</sup> Ian J. Arny,<sup>†</sup> Camryn P. Myers,<sup>†</sup> Leilah Petit,<sup>†</sup> Kumari Walpita,<sup>†</sup>  
Derrick Dunn,<sup>†</sup> Carl J. Thrasher,<sup>¶</sup> Dominik Konkolewicz<sup>†\*</sup>

<sup>†</sup>*Department of Chemistry and Biochemistry, Miami University, 651 East High Street, Oxford, OH 45056, USA.*

<sup>¶</sup>*Department of Materials Science and Engineering, Massachusetts Institute of Technology, Cambridge, MA 02142, USA*

\*Email: d.konkolewicz@miamioh.edu

## 1. Analytical Methods and Characterization

### Nuclear Magnetic Resonance (NMR)

NMR experiments were performed on Bruker Advance 400 MHz spectrometer using CDCl<sub>3</sub> as solvent at 298 K.

### Determination of Monomer Conversion by <sup>1</sup>H-NMR

Conversion was determined using NMR by integrating the sum of polymerized and unpolymerized ethyl acrylate [4.4-4.0 ppm] against the vinyl protons at 6.5, 6.1 and 5.8 ppm. Consumption of FMA and Upy was found to be near quantitative in each case by NMR (Table S1).

### Size exclusion Chromatography (SEC)

Molecular weights and dispersities were determined using an Agilent 1260 SEC system equipped with an autosampler, an Agilent 1260 isocratic pump, Agilent 1 guard and 2 analytical Polar Gel-M columns, degasser, and Agilent 1260 refractive index [RI detector] and a viscometer for universal calibration. N,N-dimethylformamide (DMF) + 0.1 wt.% LiBr was used as the eluent with a flow rate of 1 mL/min at 25 °C. The system was calibrated with poly[methyl methacrylate] standards with molecular weights the range of 617500 to 1010. All samples were filtered through a 200 nm PTFE filter prior to injection.

### Instron Tensile Testing

An Instron 3344 universal testing system equipped with a 100 N load cell was used to conduct tensile testing of the materials at room temperature to obtain stress-strain curve. The extension was increased at a rate of 0.5 mm/s. In all cases, data was collected until specimen failure. Each tensile test was repeated at least twice.

### Frequency Sweep

All frequency sweep experiments were performed using isothermal frequency sweep test method on TA instrument DMA Q800 equipped with a tension clamp. Frequency ranged from 0.01- 100 Hz at constant temperatures of 25, 45, and 65 °C. A strain of 0.3% and a preload force of 0.01 N was applied.

### Stress Relaxation

Stress relaxation was performed on a TA instrument DMA Q800 equipped with the tension film clamp. A constant strain of 10% was maintained on the material for 4 hours at 30 °C and the relative stress was recorded.

### Differential Scanning Calorimetry (DSC)

All glass transition temperatures [ $T_g$ ] were obtained using TA instrument DSC Q2000. The data was obtained in a heat cool heat cycle ranging from -50 °C to 150 °C with 10 °C/min heating rate. Data from the second heating cycle was used to plot the curve. The DSC experiment was carried out twice for reproducibility.

### Thermogravimetric Analysis (TGA)

All TGA data were obtained using a TA instrument TGA Q500. Experiments were performed using a heating rate of 10 °C/min in the range of 35 °C to 400 °C under nitrogen with a flow rate of 40 mL/min.

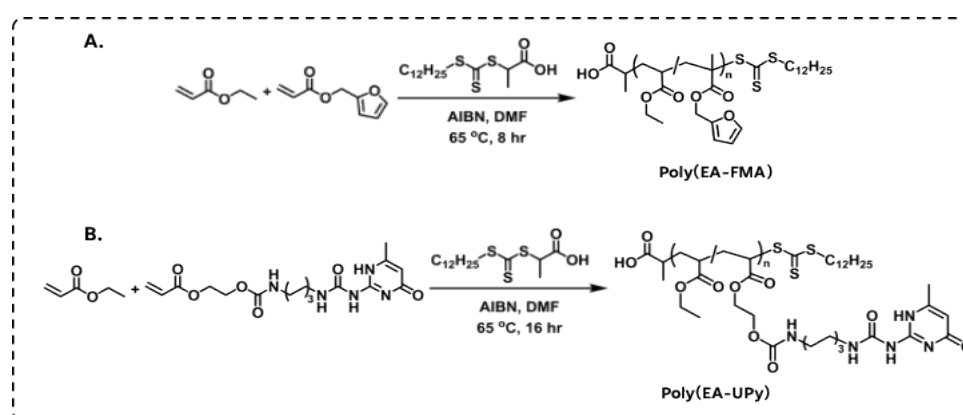

**Scheme S1.** (A) Synthesis of Poly(EA-FMA) and (B) Poly(EA-UPy) precursors for IPNs.

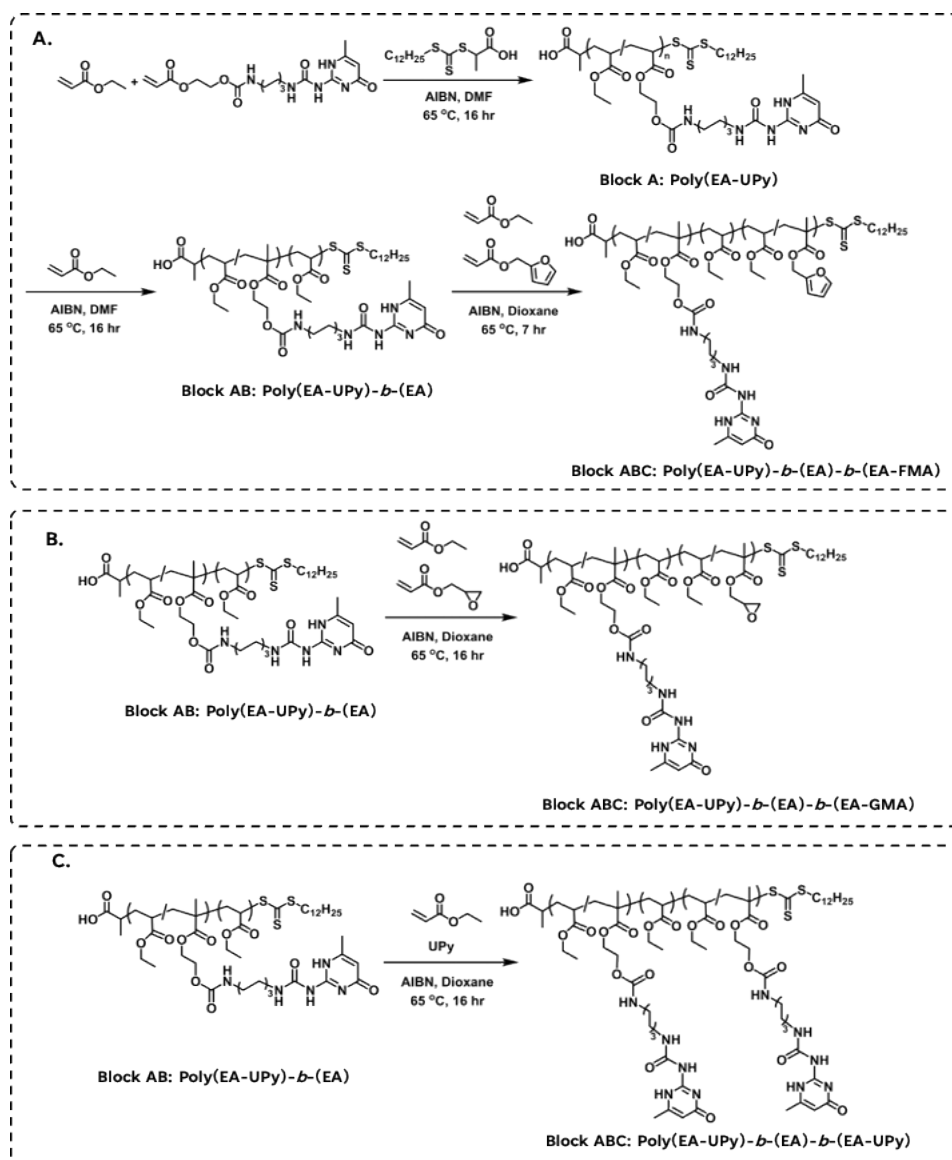

**Scheme S2.** Synthesis of BCN-based (A) ABC-type Poly(EA-UPy)-*b*-(EA)-*b*-(EA-FMA) for DPN7, (B) ABC-type Poly(EA-UPy)-*b*-(EA)-*b*-(EA-GMA) for DPN8, and (C) ABA-type Poly(EA-UPy)-*b*-(EA)-*b*-(EA-UPy) for DPN6 block copolymers using RAFT polymerization.

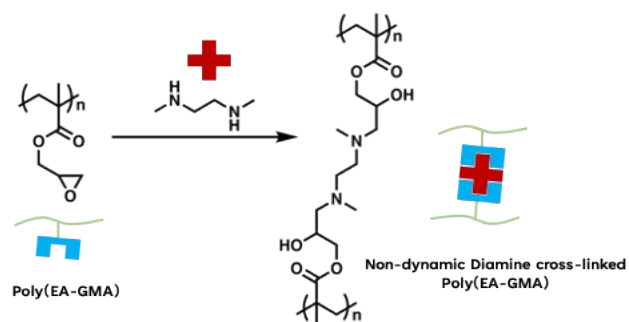

**Scheme S3.** Cross-linking of ABC-type Poly(EA-UPy)-*b*-(EA)-*b*-(EA-GMA) block copolymers is achieved through dynamic quadrupole Hydrogen bonding and through epoxy ring-opening reaction using N,N'-dimethylethylenediamine as shown above. The resulting diamine cross-links are not dynamic, hence resulting in poor dynamic properties (e.g., self-healing) for Poly(EA-UPy)-*b*-(EA)-*b*-(EA-GMA) as shown in Figure 2.

## 2. Supplemental Data

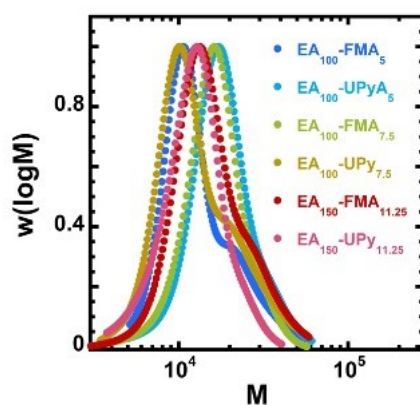

**Figure S1.** GPC traces of IPN precursors: poly(EA<sub>100</sub>-FMA<sub>5</sub>), poly(EA<sub>100</sub>-UPy<sub>5</sub>), poly(EA<sub>100</sub>-FMA<sub>7.5</sub>), poly(EA<sub>100</sub>-UPy<sub>7.5</sub>), poly(EA<sub>150</sub>-FMA<sub>11.25</sub>), and poly(EA<sub>150</sub>-UPy<sub>11.25</sub>). Dispersity data is provided in Table S1.

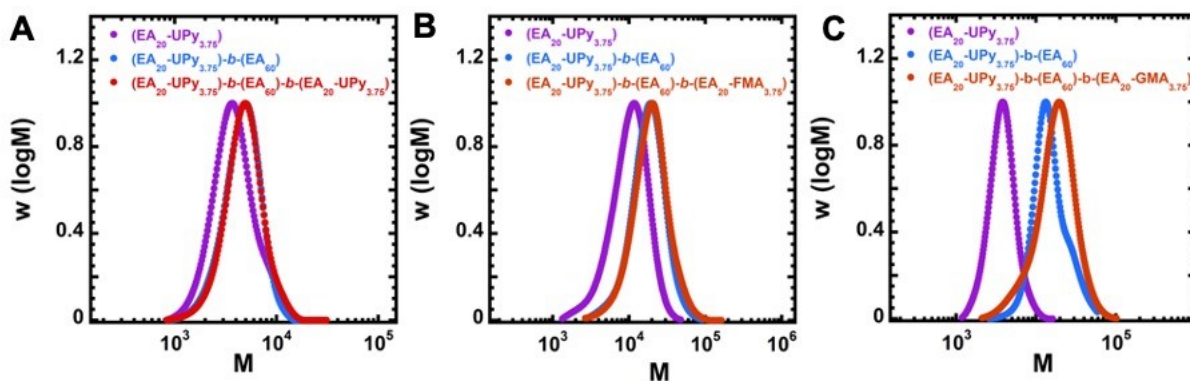

**Figure S2.** GPC traces of BCN precursors and polymers: (A) Poly(EA<sub>20</sub>-UPy<sub>3.75</sub>), Poly(EA<sub>20</sub>-UPy<sub>3.75</sub>)-*b*-(EA<sub>60</sub>), and Poly(EA<sub>20</sub>-UPy<sub>3.75</sub>)-*b*-(EA<sub>60</sub>)-*b*-(EA<sub>20</sub>-UPy<sub>3.75</sub>). (B) Poly(EA<sub>20</sub>-UPy<sub>3.75</sub>), Poly(EA<sub>20</sub>-UPy<sub>3.75</sub>)-*b*-(EA<sub>60</sub>), and Poly(EA<sub>20</sub>-UPy<sub>3.75</sub>)-*b*-(EA<sub>60</sub>)-*b*-(EA<sub>20</sub>-FMA<sub>3.75</sub>). (C) Poly(EA<sub>20</sub>-UPy<sub>3.75</sub>), Poly(EA<sub>20</sub>-UPy<sub>3.75</sub>)-*b*-(EA<sub>60</sub>), and Poly(EA<sub>20</sub>-UPy<sub>3.75</sub>)-*b*-(EA<sub>60</sub>)-*b*-(EA<sub>20</sub>-GMA<sub>3.75</sub>).

**Table S1.** Theoretical  $M_n$ , experimental  $M_n$ , and  $\bar{D}$  for polymers in this study.

| Polymers                                                                                                                        | Conversion [%] | $M_n^{\text{Theo}} \times 10^4$ | $M_n^{\text{SEC}} \times 10^4$ | $\bar{D}$ |
|---------------------------------------------------------------------------------------------------------------------------------|----------------|---------------------------------|--------------------------------|-----------|
| Poly[EA <sub>100</sub> -UPy <sub>5</sub> ]                                                                                      | >95            | 1.25                            | 1.62                           | 1.19      |
| Poly[EA <sub>100</sub> -FMA <sub>5</sub> ]                                                                                      | 80             | 1.12                            | 1.17                           | 1.23      |
| Poly[EA <sub>100</sub> -UPy <sub>7.5</sub> ]                                                                                    | >95            | 1.35                            | 1.48                           | 1.17      |
| Poly[EA <sub>100</sub> -FMA <sub>7.5</sub> ]                                                                                    | 78             | 1.16                            | 1.11                           | 1.31      |
| Poly[EA <sub>150</sub> -UPy <sub>11.25</sub> ]                                                                                  | >95            | 2.00                            | 1.32                           | 1.18      |
| Poly[EA <sub>150</sub> -FMA <sub>11.25</sub> ]                                                                                  | 81             | 1.73                            | 1.68                           | 1.25      |
| Poly[EA <sub>20</sub> -UPy <sub>3.75</sub> ]                                                                                    | >95            | 0.39                            | 0.34                           | 1.24      |
| Poly[EA <sub>20</sub> -UPy <sub>3.75</sub> ]- <i>b</i> -[EA <sub>60</sub> ]                                                     | >95            | 0.99                            | 0.84                           | 1.36      |
| Poly[EA <sub>20</sub> -UPy <sub>3.75</sub> ]- <i>b</i> -[EA <sub>60</sub> ]- <i>b</i> -[EA <sub>20</sub> -UPy <sub>3.75</sub> ] | >95            | 1.35                            | 1.62                           | 1.34      |
| Poly[EA <sub>20</sub> -UPy <sub>3.75</sub> ]- <i>b</i> -[EA <sub>60</sub> ]- <i>b</i> -[EA <sub>20</sub> -FMA <sub>3.75</sub> ] | 78             | 1.26                            | 1.54                           | 1.31      |
| Poly[EA <sub>20</sub> -UPy <sub>3.75</sub> ]- <i>b</i> -[EA <sub>60</sub> ]- <i>b</i> -[EA <sub>20</sub> -GMA <sub>3.75</sub> ] | >95            | 1.25                            | 1.45                           | 1.39      |

**Table S2.** Glass transition temperatures ( $T_g$ ) of materials in this study.

| Entry | DPN Designation                                                        | $T_g$ [°C] |
|-------|------------------------------------------------------------------------|------------|
| 1     | IPN-Lin <sub>100</sub> UPy <sub>5</sub> FMA <sub>5</sub> 0%CNT         | -4.2±0.7   |
| 2     | IPN-Lin <sub>100</sub> UPy <sub>5</sub> FMA <sub>5</sub> 0.5%CNT       | -4.9±0.2   |
| 3     | IPN-Lin <sub>100</sub> UPy <sub>5</sub> FMA <sub>5</sub> 1%CNT         | -3.8±0.1   |
| 4     | IPN-Lin <sub>100</sub> UPy <sub>7.5</sub> FMA <sub>7.5</sub> 0%CNT     | -0.6±0.1   |
| 5     | IPN-Lin <sub>100</sub> UPy <sub>7.5</sub> FMA <sub>7.5</sub> 1%CNT     | 0.9±0.1    |
| 6     | IPN-Lin <sub>100</sub> UPy <sub>7.5</sub> FMA <sub>7.5</sub> 2.5%CNT   | 2.15±0.1   |
| 7     | IPN-Lin <sub>100</sub> UPy <sub>7.5</sub> FMA <sub>15</sub> 0%CNT      | -0.3±0.7   |
| 8     | IPN-Lin <sub>100</sub> UPy <sub>7.5</sub> FMA <sub>15</sub> 1%CNT      | 1.1±0.1    |
| 9     | IPN-Lin <sub>100</sub> UPy <sub>15</sub> FMA <sub>7.5</sub> 0%CNT      | 1.9±0.4    |
| 10    | IPN-Lin <sub>100</sub> UPy <sub>15</sub> FMA <sub>7.5</sub> 1%CNT      | 0.8±0.03   |
| 11    | IPN-Lin <sub>100</sub> UPy <sub>11.25</sub> FMA <sub>11.25</sub> 0%CNT | -1.2±0.0   |
| 12    | IPN-Lin <sub>100</sub> UPy <sub>11.25</sub> FMA <sub>11.25</sub> 1%CNT | 3.4±0.1    |
| 13    | BCN-Blk <sub>100</sub> UPy <sub>7.5</sub> 0%CNT                        | -4.1±0.1   |
| 14    | BCN-Blk <sub>100</sub> UPy <sub>7.5</sub> 1%CNT                        | -5.0±0.1   |
| 15    | BCN-Blk <sub>100</sub> UPy <sub>3.75</sub> FMA <sub>3.75</sub> 0%CNT   | -7.1±0.02  |
| 16    | BCN-Blk <sub>100</sub> UPy <sub>3.75</sub> FMA <sub>3.75</sub> 1%CNT   | -6.7±0.1   |
| 17    | BCN-Blk <sub>100</sub> UPy <sub>3.75</sub> GMA <sub>3.75</sub> 0%CNT   | -6.79±0.1  |
| 18    | BCN-Blk <sub>100</sub> UPy <sub>3.75</sub> GMA <sub>3.75</sub> 1%CNT   | -6.28±0.1  |

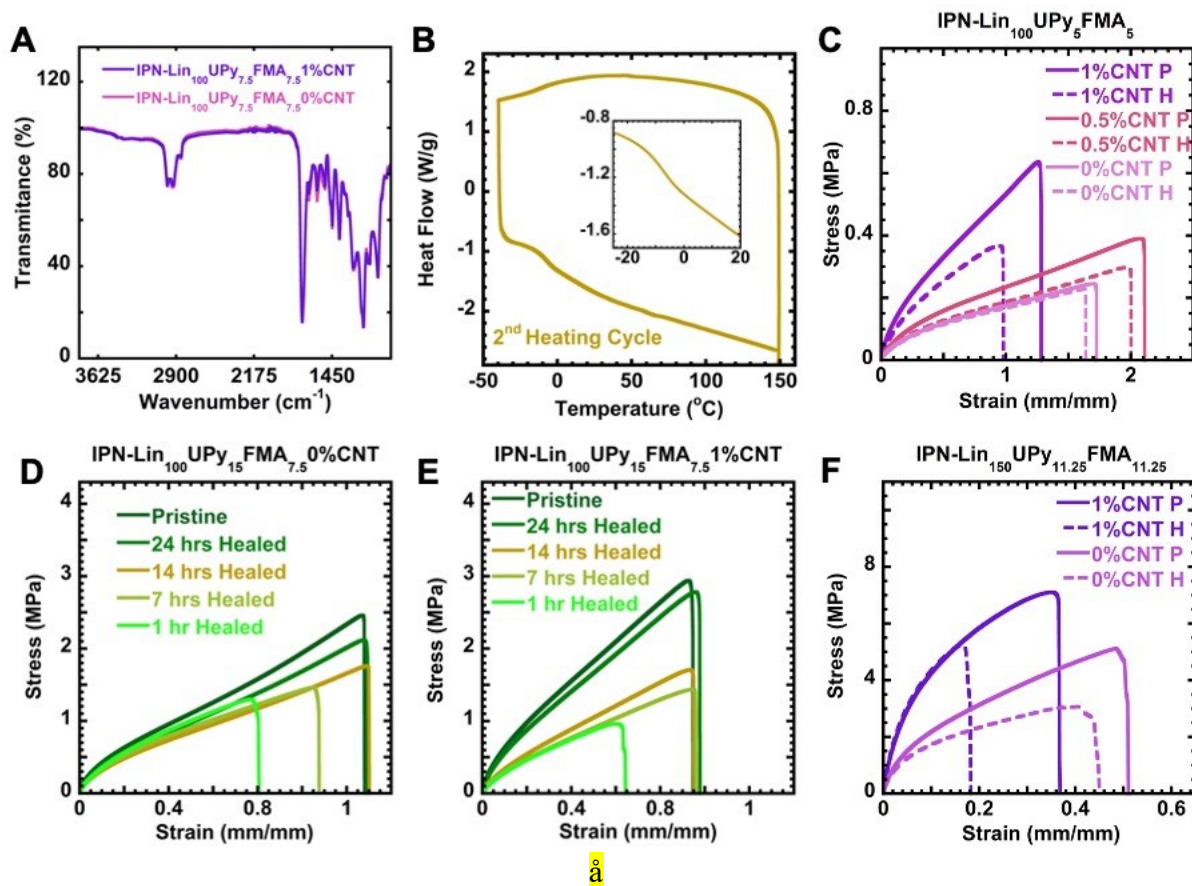

**Figure S3.** (A) Typical IR spectra for reinforced and reinforced IPN-Lin<sub>100</sub>UPy<sub>7.5</sub>FMA<sub>7.5</sub>. (B) Typical DSC plot of DPNs using a BCN-Blk<sub>100</sub>UPy<sub>7.5</sub>0%CNT sample. (C) Stress-strain tensile testing of mechanical properties for IPN-Lin<sub>100</sub>UPy<sub>5</sub>FMA<sub>7.5</sub>. (D) Time evolution self-healing of IPN-Lin<sub>100</sub>UPy<sub>15</sub>FMA<sub>7.5</sub>0%CNT and (E) IPN-Lin<sub>100</sub>UPy<sub>15</sub>FMA<sub>7.5</sub>1%CNT. (F) Stress-strain tensile testing of mechanical properties for IPN-Lin<sub>150</sub>UPy<sub>11.25</sub>FMA<sub>11.25</sub>.

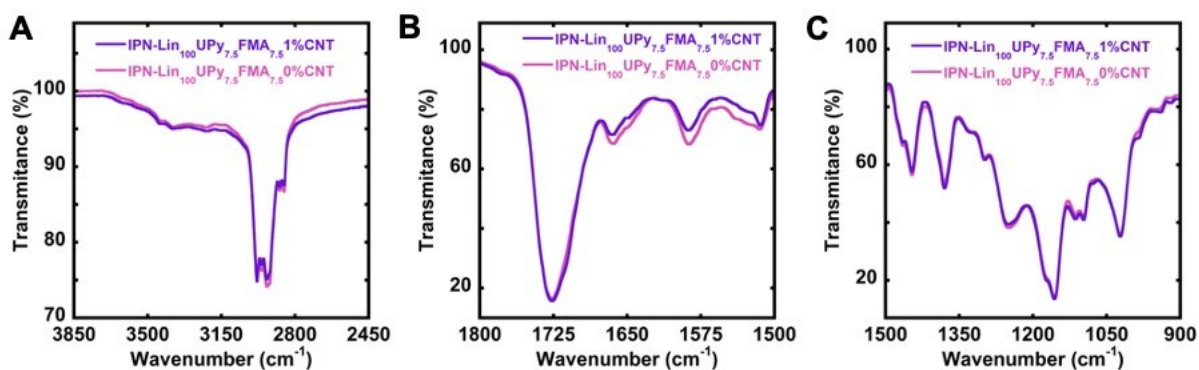

**Figure S4.** Closer look (zoomed-in) IR spectrum for reinforced and unreinforced IPN-Lin<sub>100</sub>UPy<sub>7.5</sub>FMA<sub>7.5</sub> materials.

**Table S3.** Proposed peak assignments for IR spectra of IPN-Lin<sub>100</sub>UPy<sub>7.5</sub>FMA<sub>7.5</sub> from Figure S3(A) and Figure S4(A-C).

| Peak (cm <sup>-1</sup> ) | Assignment                               |
|--------------------------|------------------------------------------|
| 3500-3340                | Secondary N-H Stretch                    |
| 3550-2550                | Carboxylic Acid O-H Stretch              |
| 3000-2800                | C-H Alkene Stretch                       |
| 1785-1700                | C=O Ester Stretch                        |
| 1700-1685                | Conjugated Amide C=O Stretch             |
| 1600-1520                | C=C Alkene stretch                       |
| 1490-1440                | C-H Scissor Bend                         |
| 1390-1360                | C-C Aliphatic Bend                       |
| 1270-1200                | C-O Asymmetric Stretch                   |
| 1150-1100                | Tertiary and Secondary C-O Ester Stretch |
| 1025-1000                | C-O-C Stretch                            |

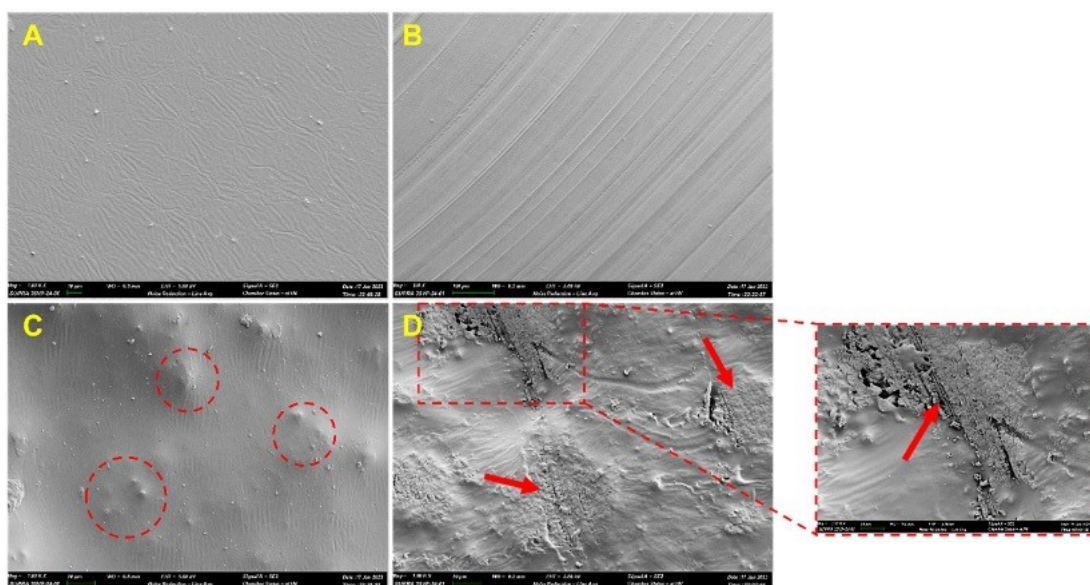

**Figure S5.** Scanning electron micrographs of (A) surface and (B) razor-sliced cross-section of IPN-Lin<sub>100</sub>UPy<sub>7.5</sub>FMA<sub>7.5</sub>0%CNT. (C) Surface and (D) razor-sliced cross-section of IPN-Lin<sub>100</sub>UPy<sub>7.5</sub>FMA<sub>7.5</sub>2.5%CNT.

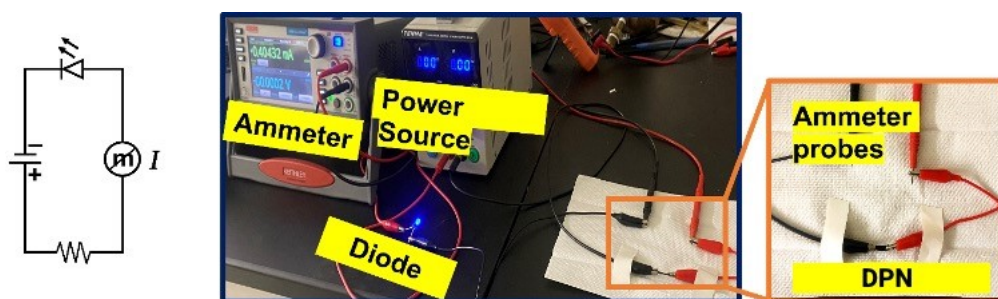

**Figure S6.** Electrical circuit and set-up for measuring current flowing through the circuit using IPN-Lin<sub>100</sub>UPy<sub>7.5</sub>FMA<sub>7.5</sub>2.5%CNT as DPN

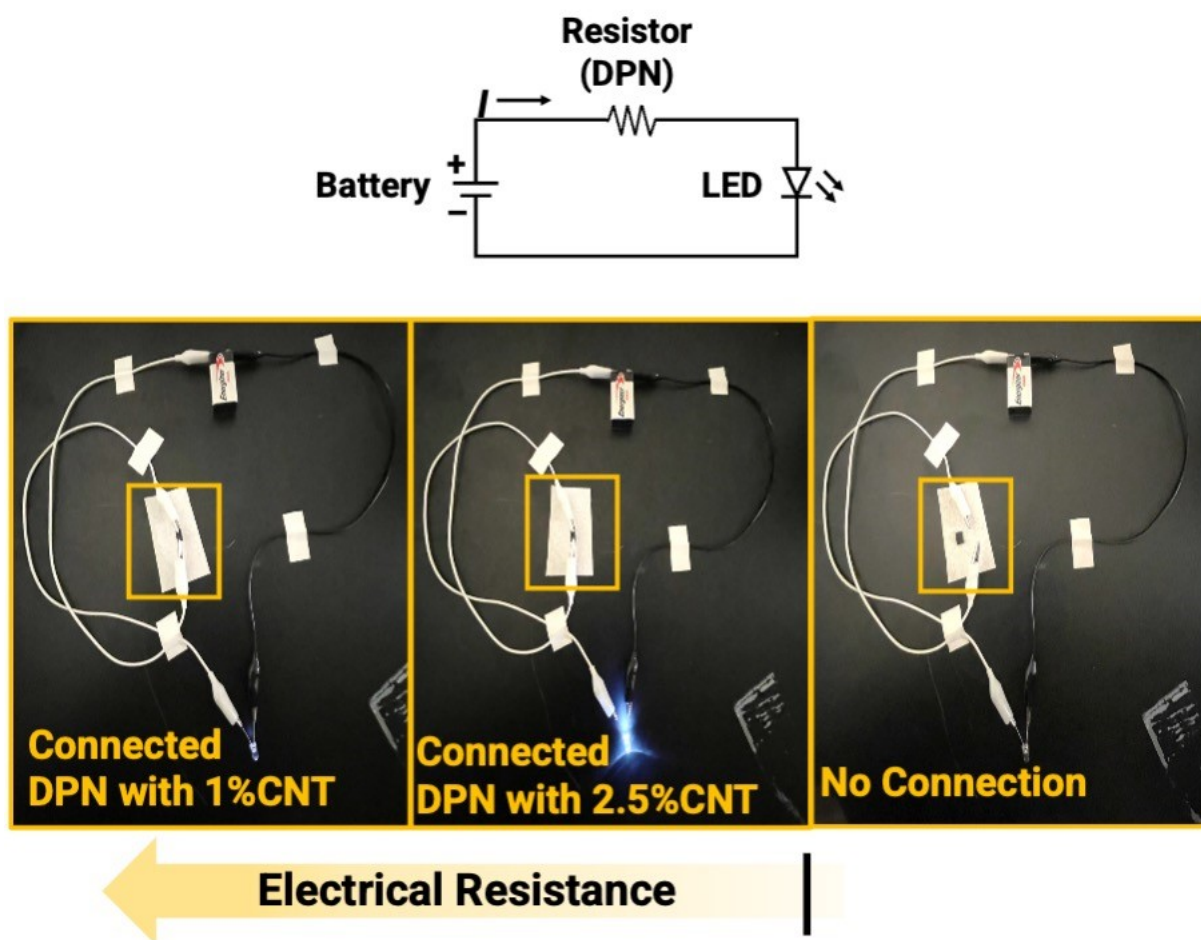

**Figure S7.** Impact of CNT loading on the electrical resistance of IPN-Lin<sub>100</sub>UPy<sub>7.5</sub>FMA<sub>7.5</sub> as DPN in a circuit system.

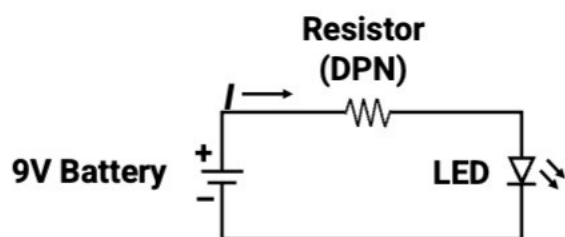

**Polymer does not loose conductive ability over time**

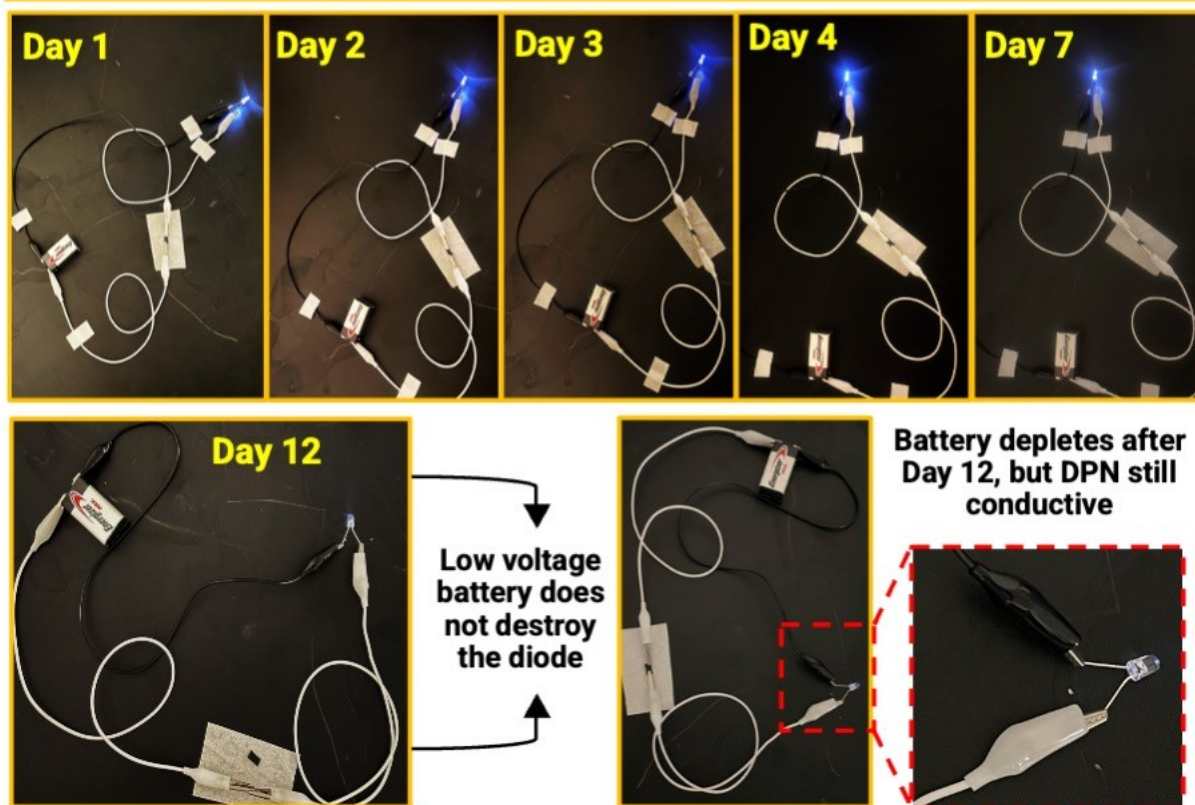

**Figure S8.** Conduction of current through IPN-Lin<sub>100</sub>UPy<sub>7.5</sub>FMA<sub>7.5</sub>2.5%CNT in a circuit system which lasted until circuit battery was depleted.

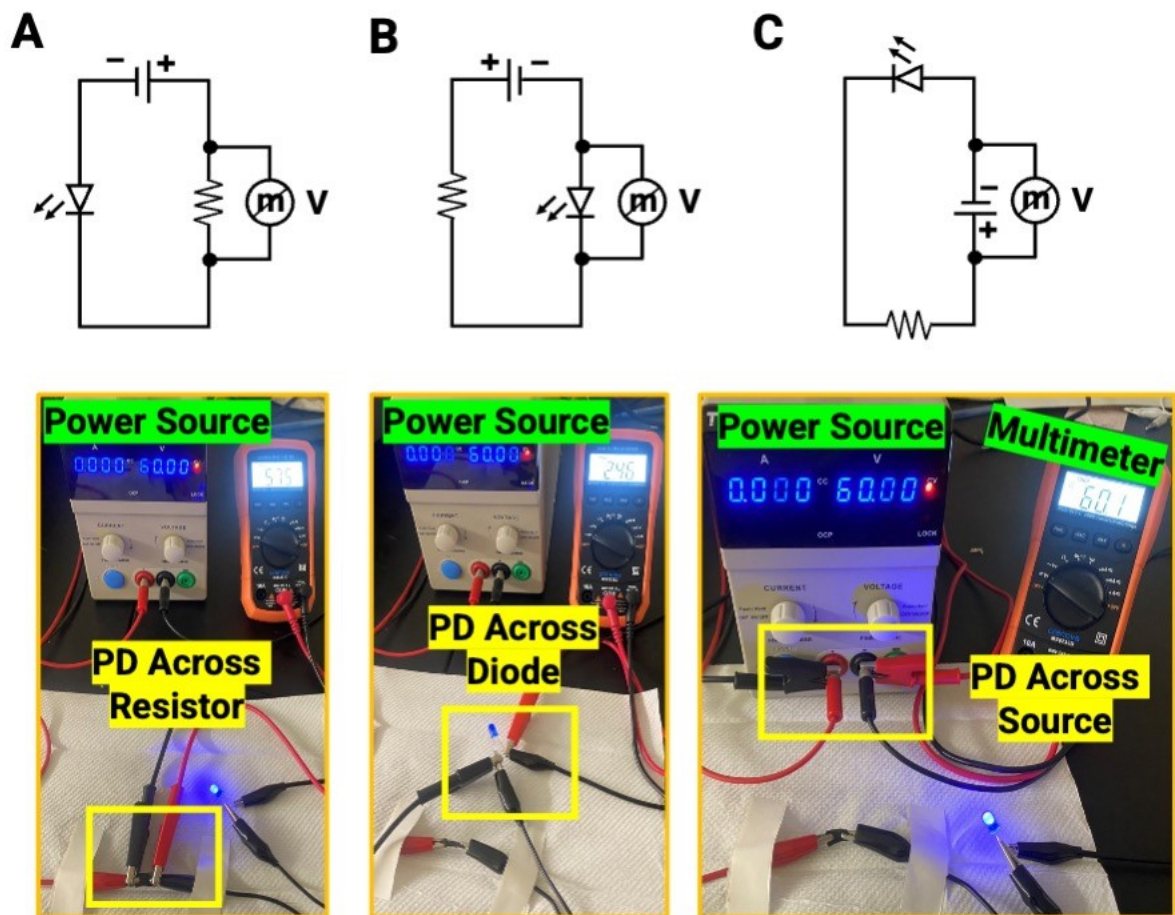

**Figure S9.** Electrical circuits and set-ups showing measurements of PD across (A) resistor, (B) diode, and (C) source.

**Table S4.** Verifying PD in IPN-Lin<sub>100</sub>UPy<sub>7.5</sub>FMA<sub>7.5</sub>2.5%CNT using circuit set-ups as shown in Figure S9.

| PD Across Source [V] | PD Across Resistor [V] | PD Across Diode [V] | PD [V] Across [Resistor + Diode] |
|----------------------|------------------------|---------------------|----------------------------------|
| 10.00                | 07.56                  | 02.45               | 10.01                            |
| 20.00                | 17.57                  | 02.44               | 20.01                            |
| 30.00                | 27.50                  | 02.49               | 29.99                            |
| 40.00                | 37.50                  | 02.51               | 40.01                            |
| 50.00                | 47.50                  | 02.50               | 50.00                            |
| 60.00                | 57.50                  | 02.52               | 60.02                            |

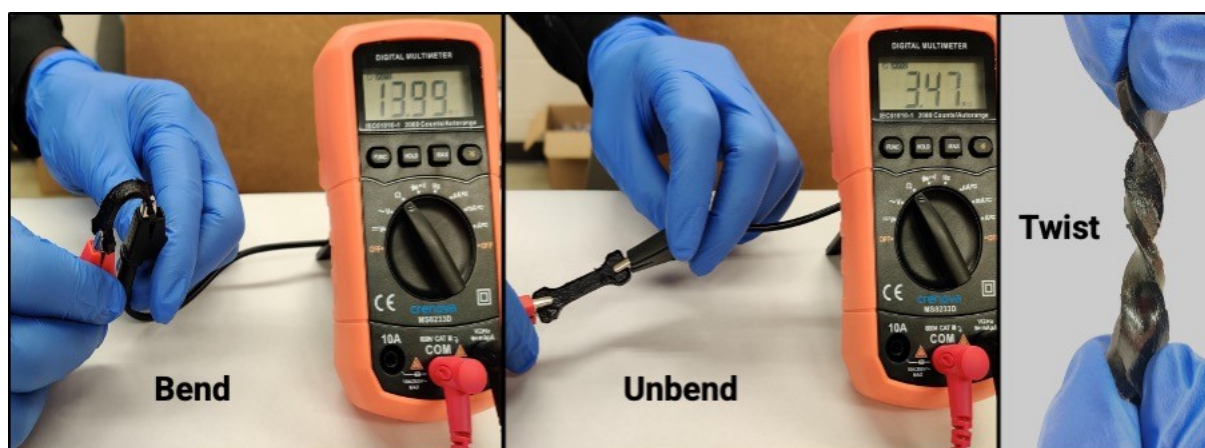

**Figure S10.** IPN-Lin<sub>100</sub>UPy<sub>7.5</sub>FMA<sub>7.5</sub>2.5%CNT attached to a multimeter with bending and unbending photographs. Also twisted IPN-Lin<sub>100</sub>UPy<sub>7.5</sub>FMA<sub>7.5</sub>2.5%CNT is shown with good flexibility.

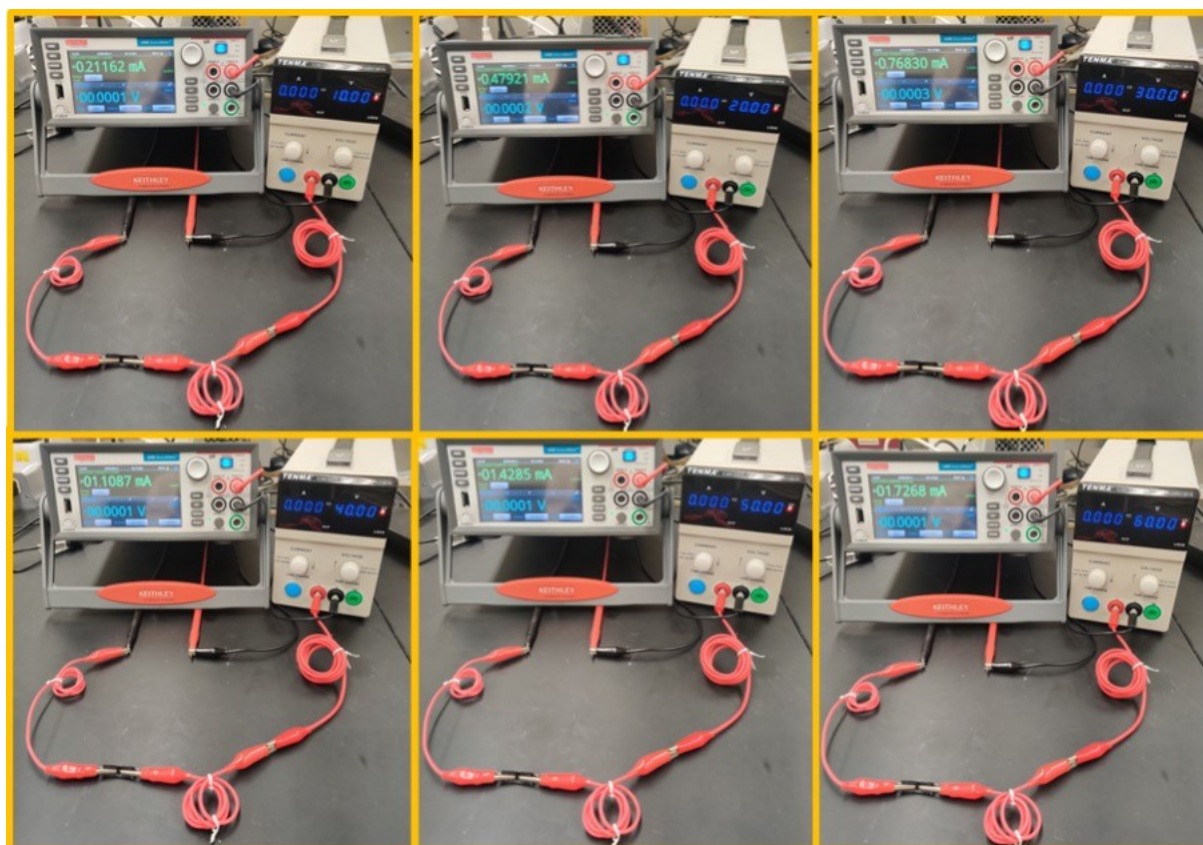

**Figure S11.** Typical set-up for measuring the impact of current on custom resistors using 30%L-70%H with applied voltage of 10, 20, 30, 40, 50, 60 V to obtain current-voltage plot.
